# Supplementary material for: Molecular docking reveals the potential of Cleome amblyocarpa isolated compounds to inhibit COVID-19 virus main protease
Source: Royal Society of Chemistry journal article supplement (doi:10.1039/d0nj03611k), 2020-01-01
Supplement: d0nj03611k1.pdf [file d0nj03611k1.pdf]

## SUPPLEMENTARY MATERIAL

### Molecular docking reveals the potential of *Cleome amblyocarpa* isolated compounds to inhibit COVID-19 virus main protease

Ahmed A. Zaki<sup>a</sup>, Ahmed A. Al-Karmalawy<sup>b</sup>, Yasser A. El-Amier<sup>d</sup>, Ahmed Ashour<sup>a,c</sup>

<sup>a</sup>Department of Pharmacognosy, Faculty of Pharmacy, Mansoura University, Mansoura 35516, Egypt.

<sup>b</sup>Department of Medicinal Pharmaceutical Chemistry, Faculty of Pharmacy, Horus University-Egypt, New Damietta 34518, Egypt.

<sup>c</sup>Department of Pharmacognosy, Faculty of Pharmacy, Horus University, New Damietta, Egypt.

<sup>d</sup>Botany Department, Ecology, Faculty of Science, Mansoura University, Mansoura 35516, Egypt.

#### Abstract

Nine flavonoids and one saponin were isolated from the aerial parts of *Cleome amblyocarpa*. Molecular Docking of isolated compounds on COVID-19 virus main protease showed variable binding affinities with scores ranging from (-8.63 to -6.08) compared to N3 inhibitor (-10.10) and binding modes better than N3 inhibitor in some of the isolated compounds. The descending order of binding affinity of the tested drugs was as follow; N3 inhibitor (**11**, docked) > kaempferitrin (**6**) > isorhamnetin 3,7-*O*- $\alpha$ -L-dirhamnoside (**3**) > kaempferol 3-*O*- $\beta$ -glucoside-7-*O*- $\alpha$ -rhamnoside (**2**) > soysaponin (**1**) > isorhamnetin 7-*O*- $\alpha$ -L-rhamnoside (**10**) > genistein-8-*C*-glucoside (**8**) > tamarixetin 7-*O*- $\beta$ -D-glucoside (**4**) > isoprunitin-7-glucoside (**9**) > genistin (**5**) > 5-*O*-methylgenistein (**7**). These results could be a good start for fast further examining the isolated compounds *in vitro* and *in vivo* either alone or in combinations for the treatment of COVID-19 virus. In addition, this work gives an explanation on the SAR required for targeting the newly emerged SARS-CoV-2 protease and facilitates the future design and synthesis of new drugs targeting it as well.

Key words: COVID-19; *Cleome amblyocarpa*; molecular docking; flavanoids

\*Corresponding authors:

**Ahmed Ashour**

Department of Pharmacognosy, Faculty of Pharmacy, Mansoura University, Mansoura 35516, Egypt. Email: [ahmedadelashour@yahoo.com](mailto:ahmedadelashour@yahoo.com)

## List of figures

| <b>No.</b> | <b>Title</b>                                                                                |
|------------|---------------------------------------------------------------------------------------------|
| <b>S1</b>  | <sup>1</sup> H - NMR spectrum (DMSO- <i>d</i> <sub>6</sub> , 400 MHz) of compound <b>1</b>  |
| <b>S2</b>  | <sup>13</sup> C NMR spectrum (DMSO- <i>d</i> <sub>6</sub> , 100 MHz) of compound <b>1</b>   |
| <b>S3</b>  | <sup>1</sup> H - NMR spectrum (DMSO- <i>d</i> <sub>6</sub> , 400 MHz) of compound <b>2</b>  |
| <b>S4</b>  | <sup>13</sup> C NMR spectrum (DMSO- <i>d</i> <sub>6</sub> , 100 MHz) of compound <b>2</b>   |
| <b>S5</b>  | <sup>1</sup> H - NMR spectrum (DMSO- <i>d</i> <sub>6</sub> , 400 MHz) of compound <b>3</b>  |
| <b>S6</b>  | <sup>13</sup> C NMR spectrum (DMSO- <i>d</i> <sub>6</sub> , 100 MHz) of compound <b>3</b>   |
| <b>S7</b>  | <sup>1</sup> H - NMR spectrum (DMSO- <i>d</i> <sub>6</sub> , 400 MHz) of compound <b>4</b>  |
| <b>S8</b>  | <sup>13</sup> C NMR spectrum (DMSO- <i>d</i> <sub>6</sub> , 100 MHz) of compound <b>4</b>   |
| <b>S9</b>  | <sup>1</sup> H - NMR spectrum (DMSO- <i>d</i> <sub>6</sub> , 400 MHz) of compound <b>5</b>  |
| <b>S10</b> | <sup>13</sup> C NMR spectrum (DMSO- <i>d</i> <sub>6</sub> , 100 MHz) of compound <b>5</b>   |
| <b>S11</b> | <sup>1</sup> H - NMR spectrum (DMSO- <i>d</i> <sub>6</sub> , 400 MHz) of compound <b>6</b>  |
| <b>S12</b> | <sup>13</sup> C NMR spectrum (DMSO- <i>d</i> <sub>6</sub> , 100 MHz) of compound <b>6</b>   |
| <b>S13</b> | <sup>1</sup> H - NMR spectrum (DMSO- <i>d</i> <sub>6</sub> , 400 MHz) of compound <b>7</b>  |
| <b>S14</b> | <sup>13</sup> C NMR spectrum (DMSO- <i>d</i> <sub>6</sub> , 100 MHz) of compound <b>7</b>   |
| <b>S15</b> | <sup>1</sup> H - NMR spectrum (CD <sub>3</sub> OD, 400 MHz) of compound <b>8</b>            |
| <b>S16</b> | <sup>13</sup> C NMR spectrum (CD <sub>3</sub> OD, 100 MHz) of compound <b>8</b>             |
| <b>S17</b> | <sup>1</sup> H - NMR spectrum (CD <sub>3</sub> OD, 400 MHz) of compound <b>9</b>            |
| <b>S18</b> | <sup>13</sup> C NMR spectrum (CD <sub>3</sub> OD, 100 MHz) of compound <b>9</b>             |
| <b>S19</b> | <sup>1</sup> H - NMR spectrum (DMSO- <i>d</i> <sub>6</sub> , 400 MHz) of compound <b>10</b> |
| <b>S20</b> | <sup>13</sup> C NMR spectrum (DMSO- <i>d</i> <sub>6</sub> , 100 MHz) of compound <b>10</b>  |

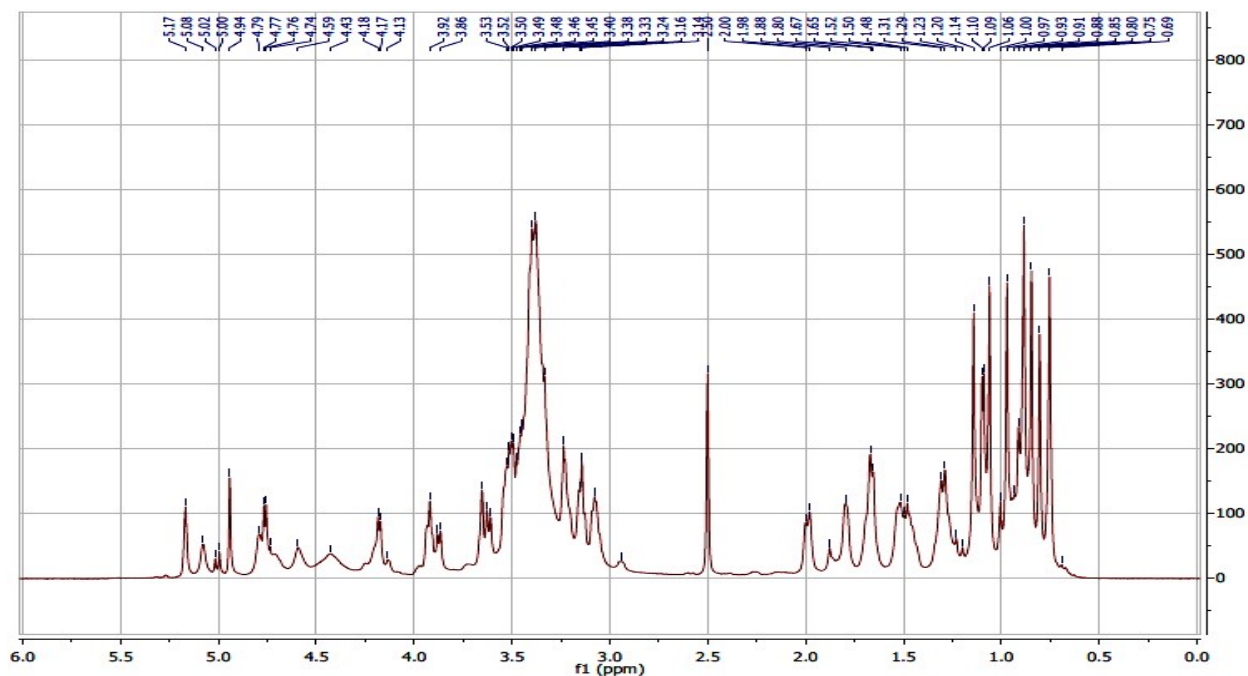

Figure S1:  $^1\text{H}$  - NMR spectrum (DMSO- $d_6$ , 400 MHz) of compound **1**

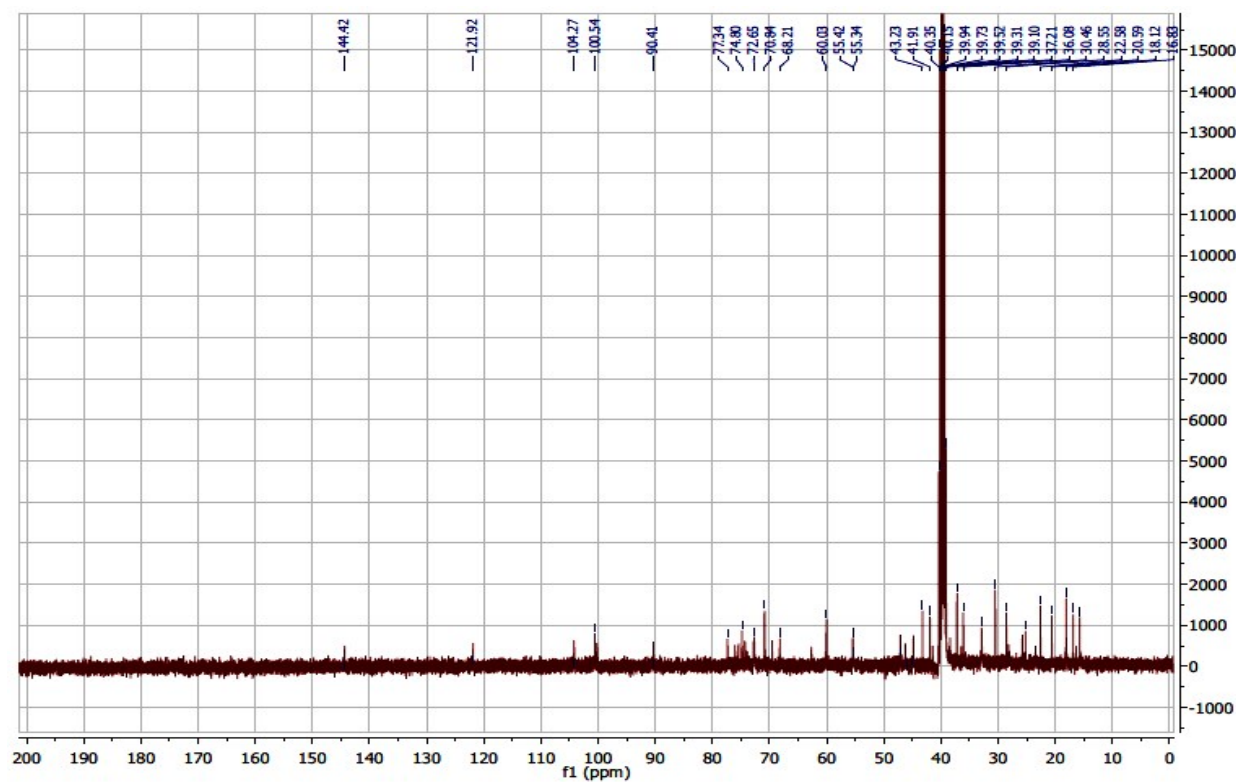

Figure S2:  $^{13}\text{C}$  NMR spectrum (DMSO- $d_6$ , 100 MHz) of compound **1**

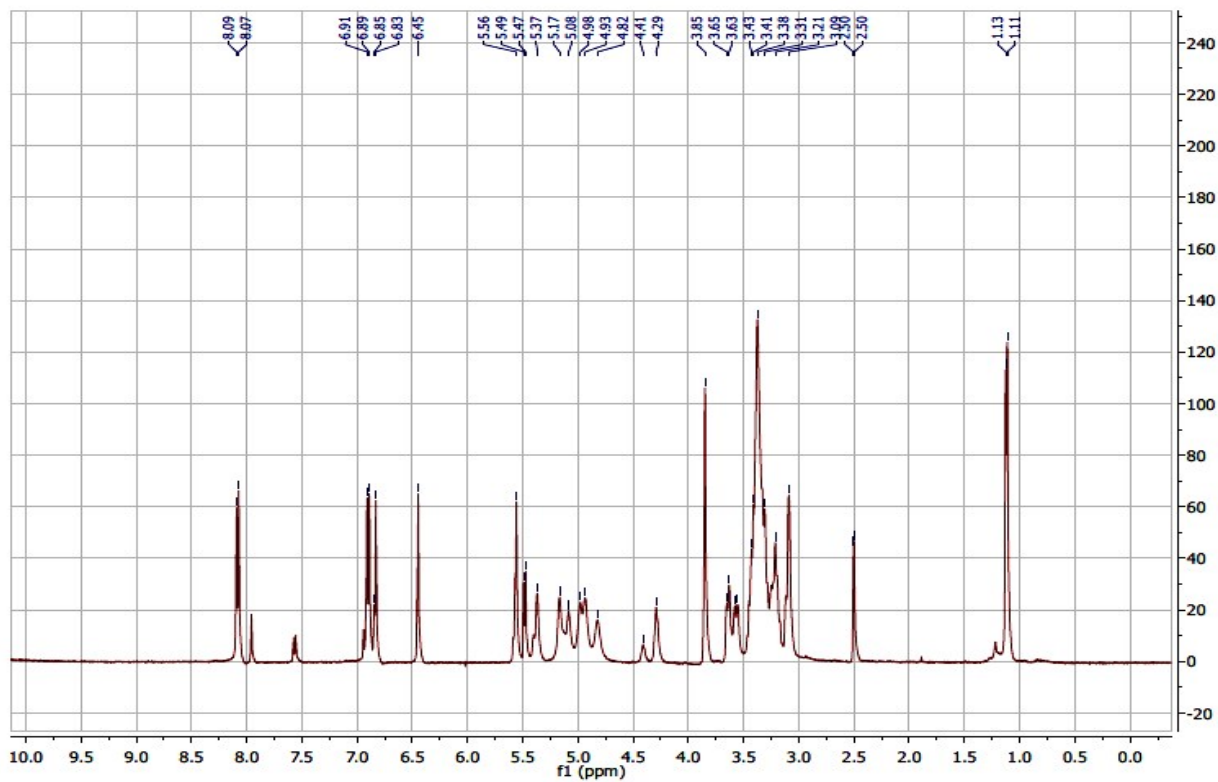

Figure S3:  $^1\text{H}$  - NMR spectrum (DMSO- $d_6$ , 400 MHz) of compound 2

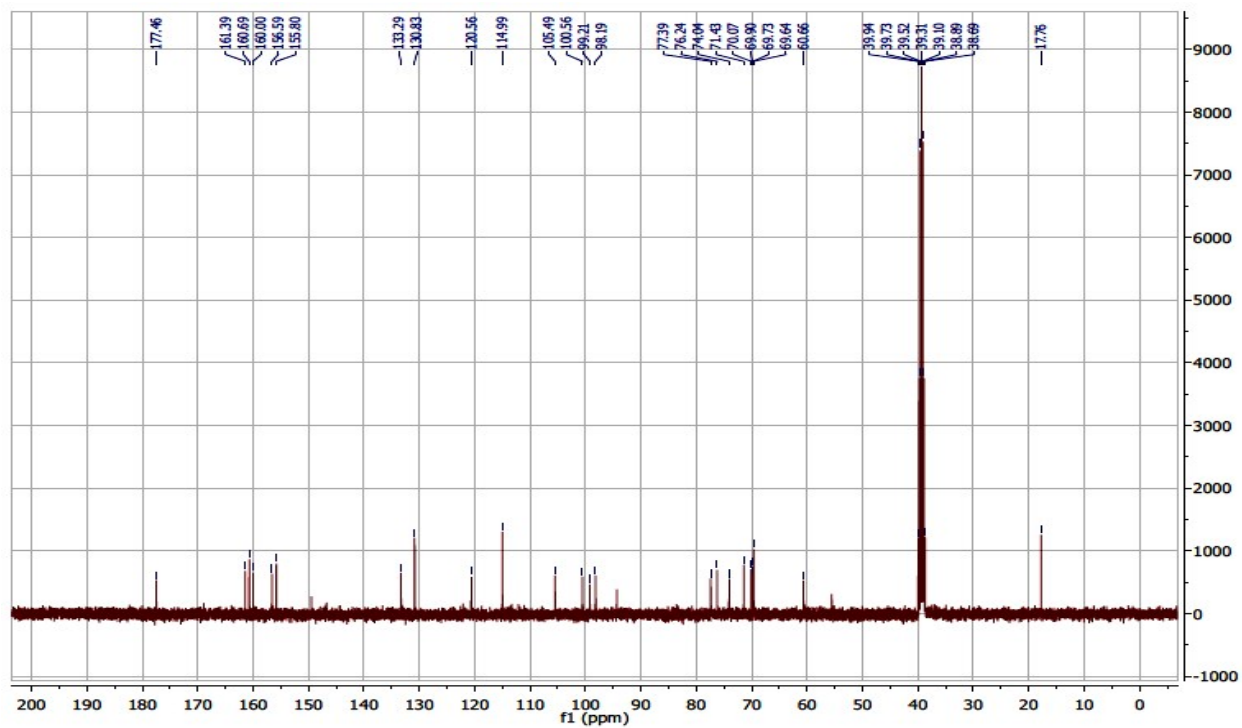

Figure S4:  $^{13}\text{C}$  NMR spectrum (DMSO- $d_6$ , 100 MHz) of compound 2

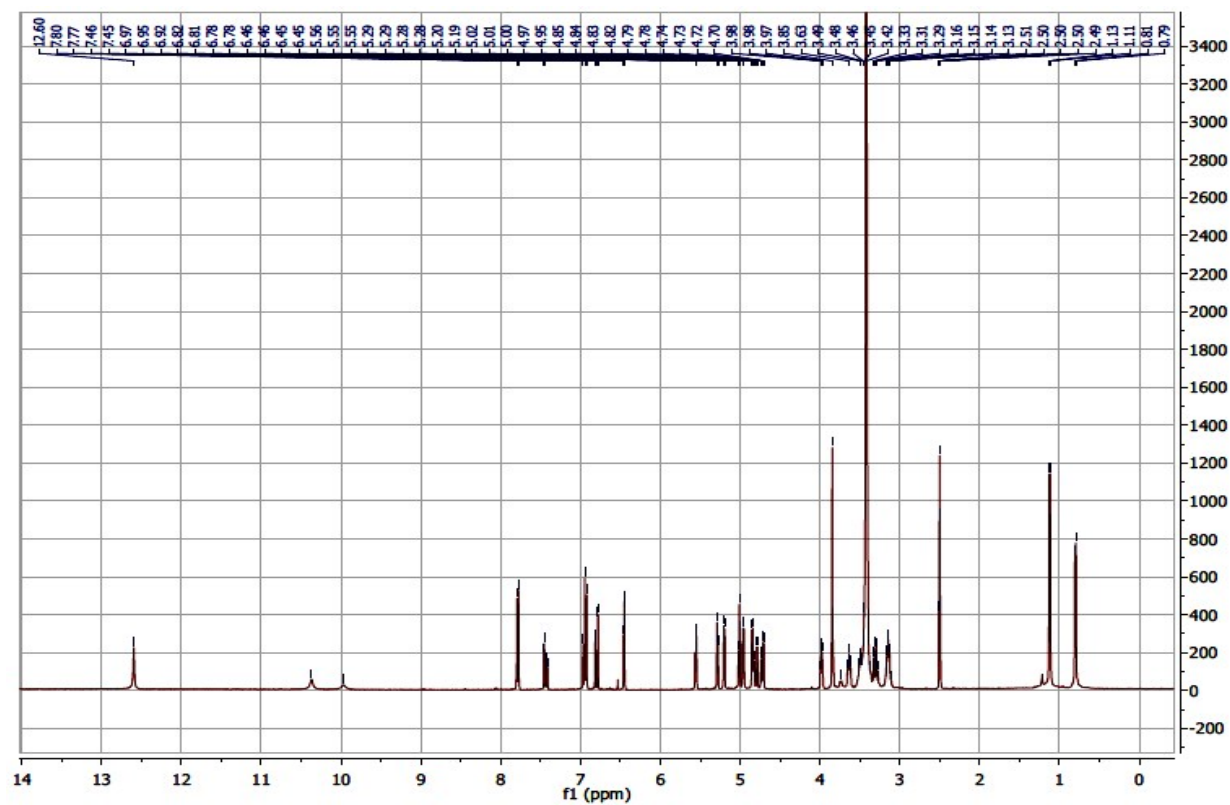

Figure S5:  $^1\text{H}$ -NMR spectrum ( $\text{DMSO-}d_6$ , 400 MHz) of compound 3

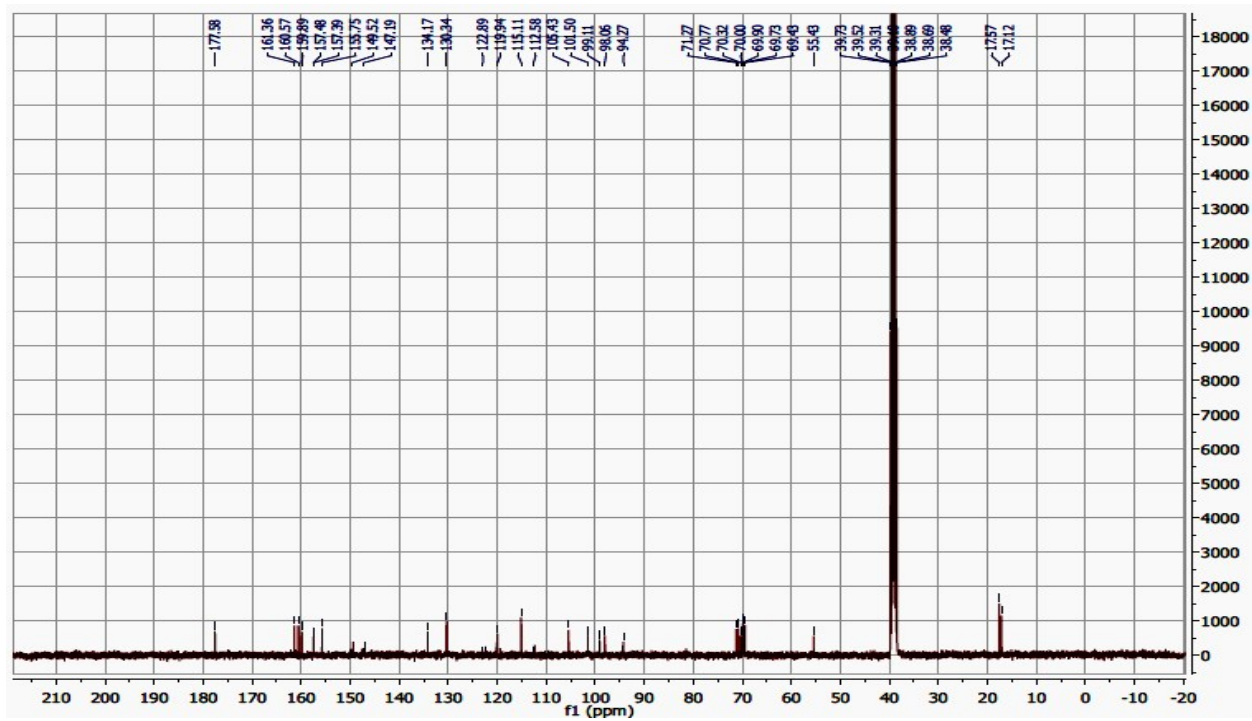

Figure S6:  $^{13}\text{C}$  NMR spectrum ( $\text{DMSO-}d_6$ , 100 MHz) of compound 3



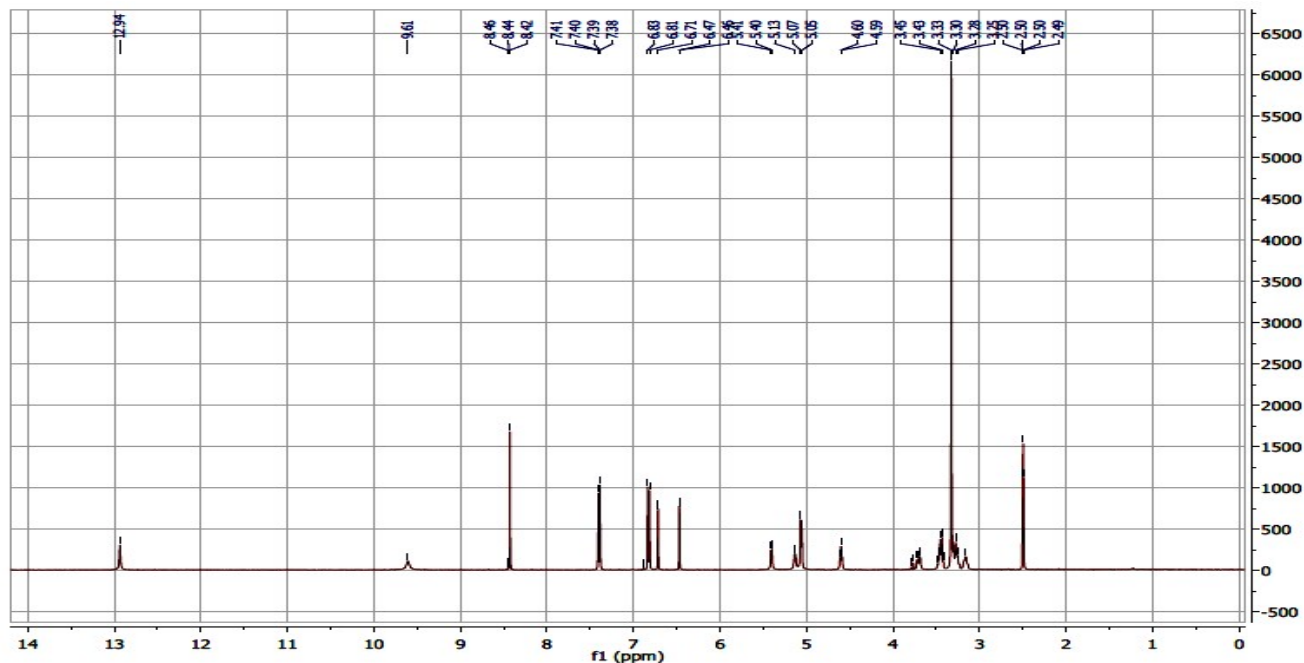

Figure S9:  $^1\text{H}$  - NMR spectrum (DMSO- $d_6$ , 400 MHz) of compound 5

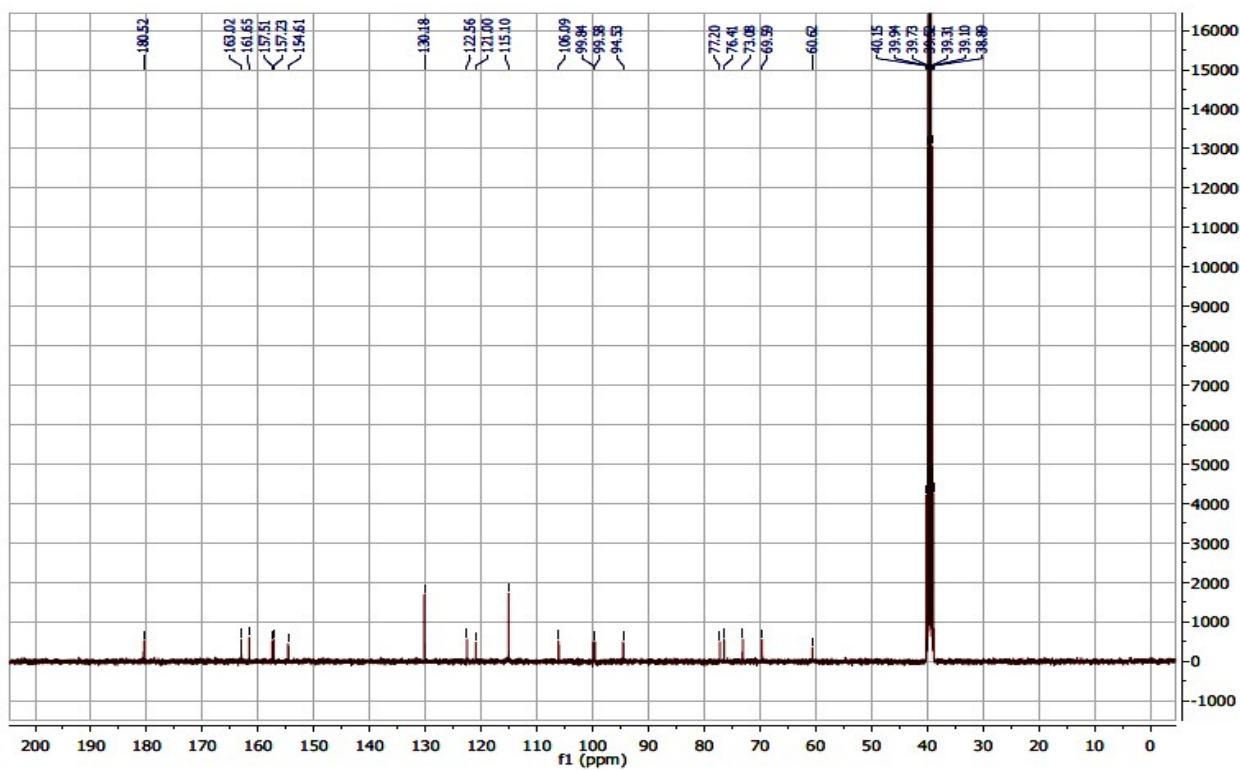

Figure S10:  $^{13}\text{C}$  NMR spectrum (DMSO- $d_6$ , 100 MHz) of compound 5

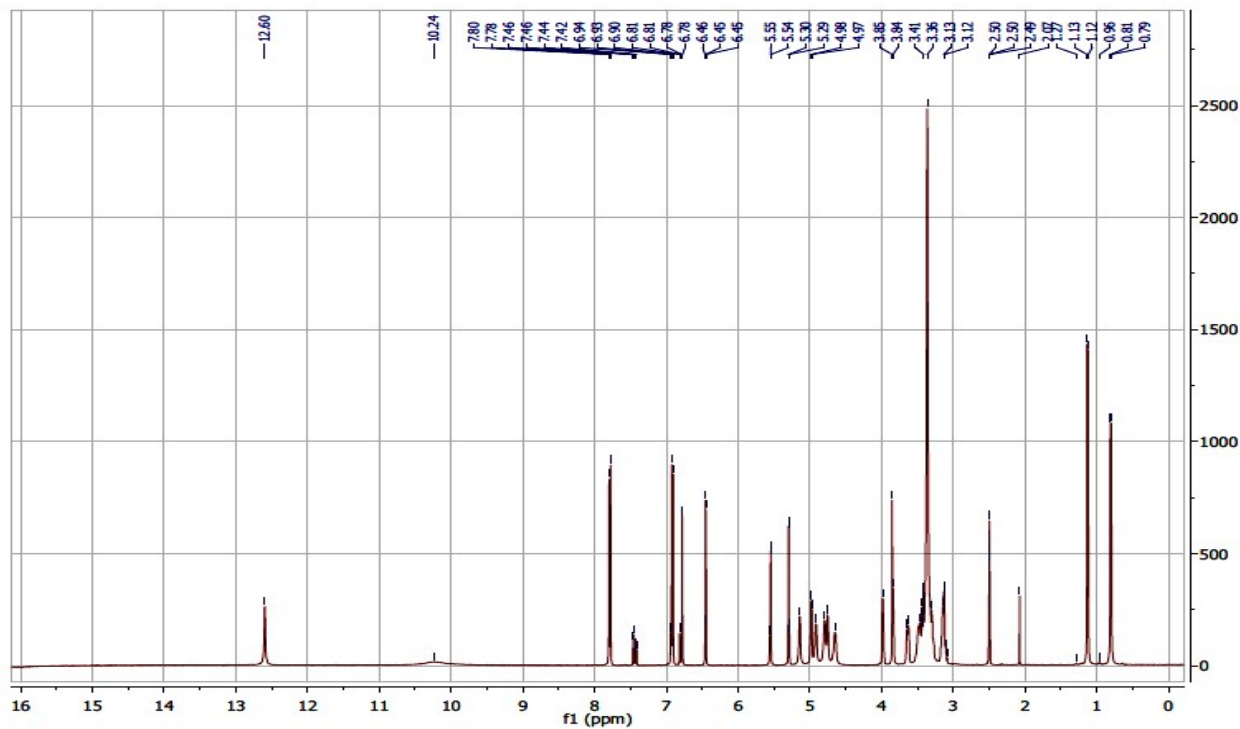

Figure S11:  $^1\text{H}$  - NMR spectrum (DMSO- $d_6$ , 400 MHz) of compound 6

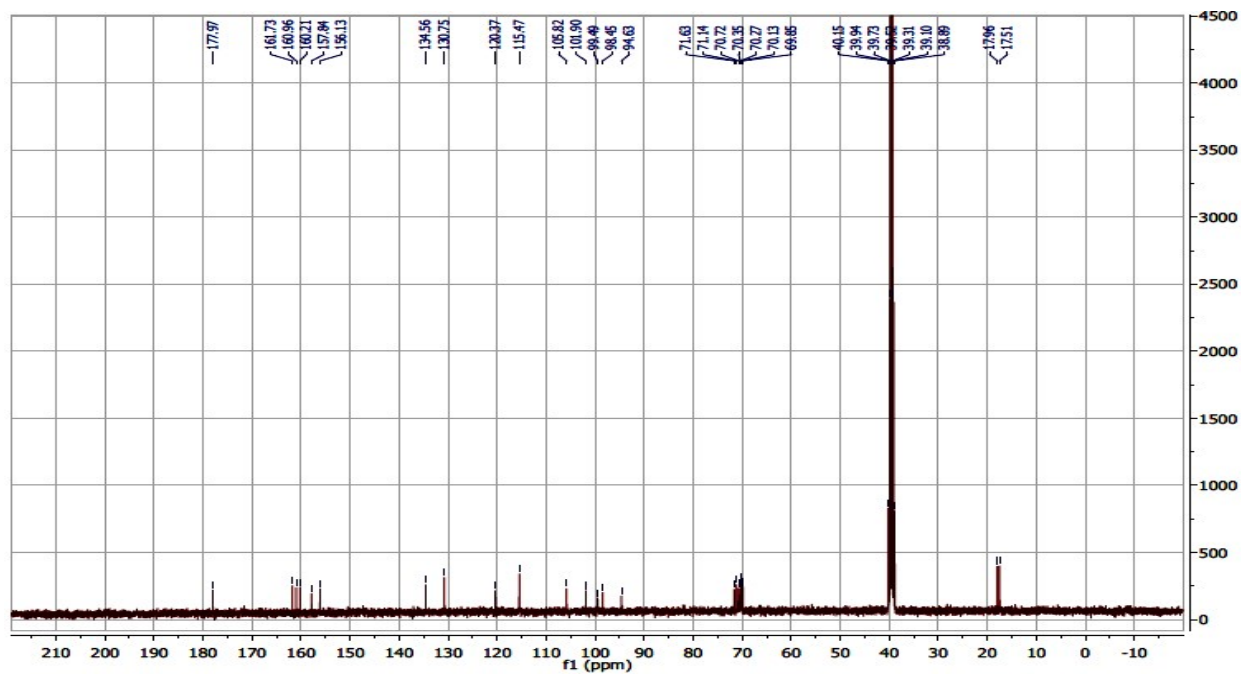

Figure S12:  $^{13}\text{C}$  NMR spectrum (DMSO- $d_6$ , 100 MHz) of compound 6



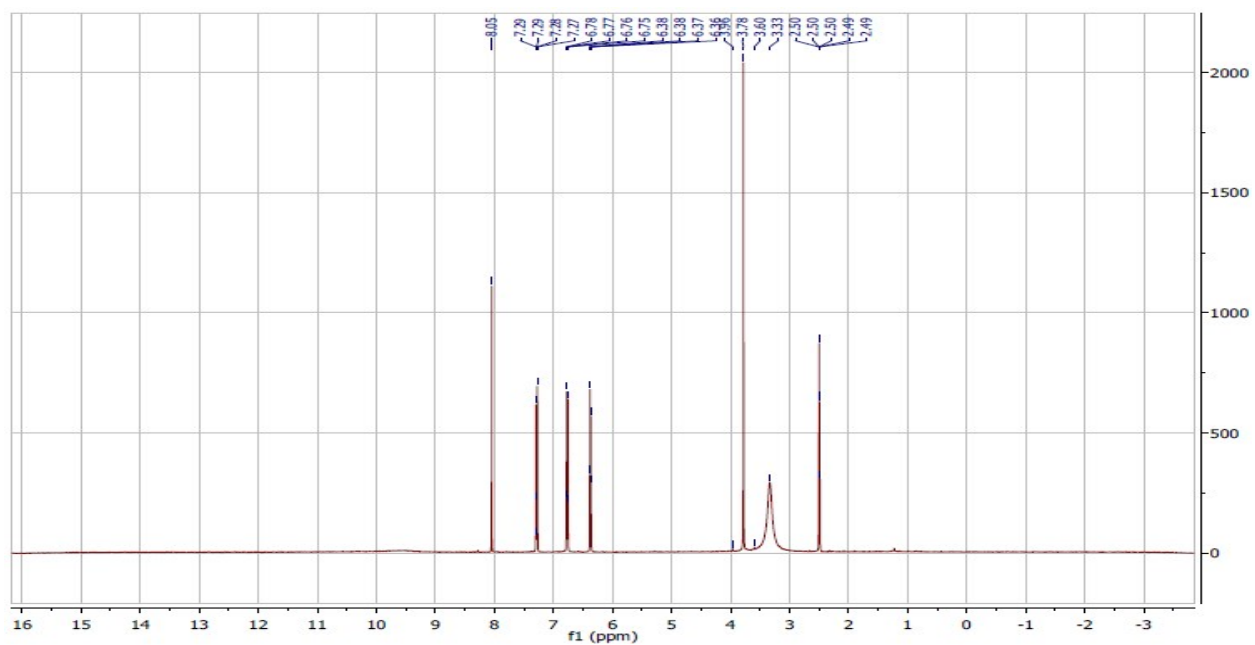

Figure S13:  $^1\text{H}$  - NMR spectrum (DMSO- $d_6$ , 400 MHz) of compound 7

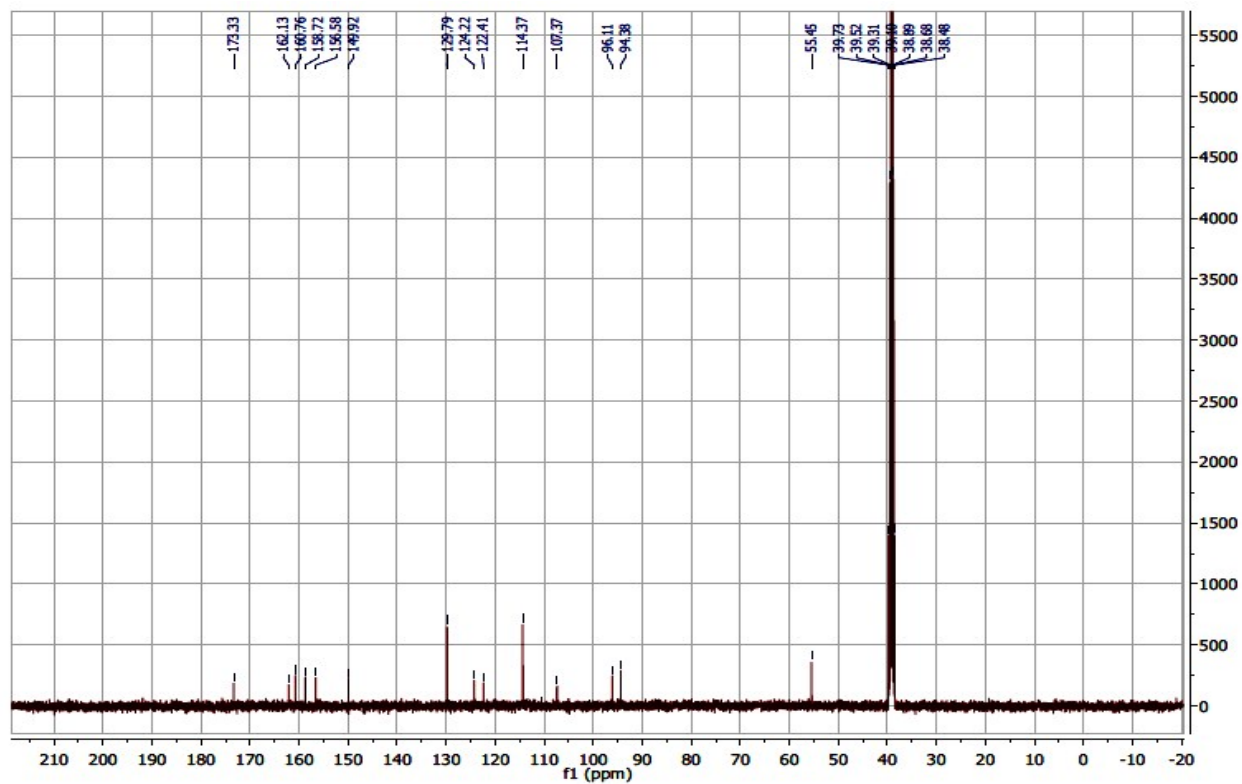

Figure S14:  $^{13}\text{C}$  NMR spectrum (DMSO- $d_6$ , 100 MHz) of compound 7

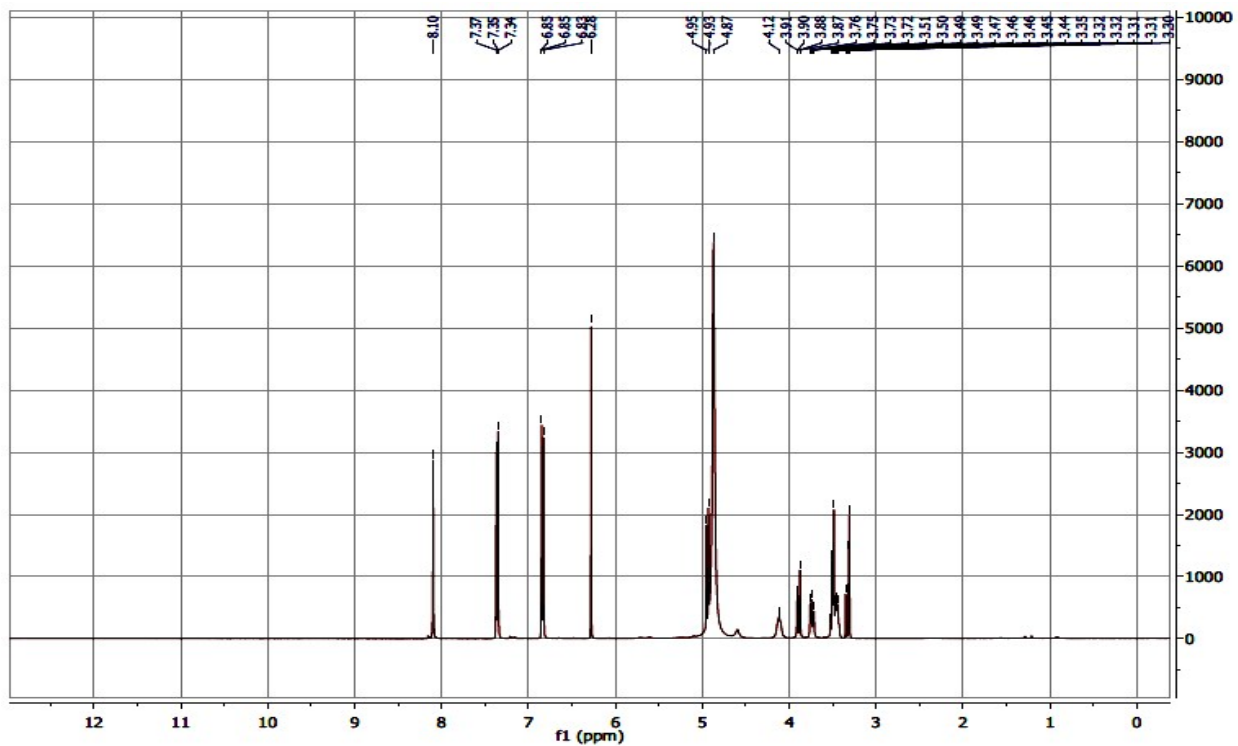

Figure S15:  $^1\text{H}$  - NMR spectrum ( $\text{CD}_3\text{OD}$ , 400 MHz) of compound **8**

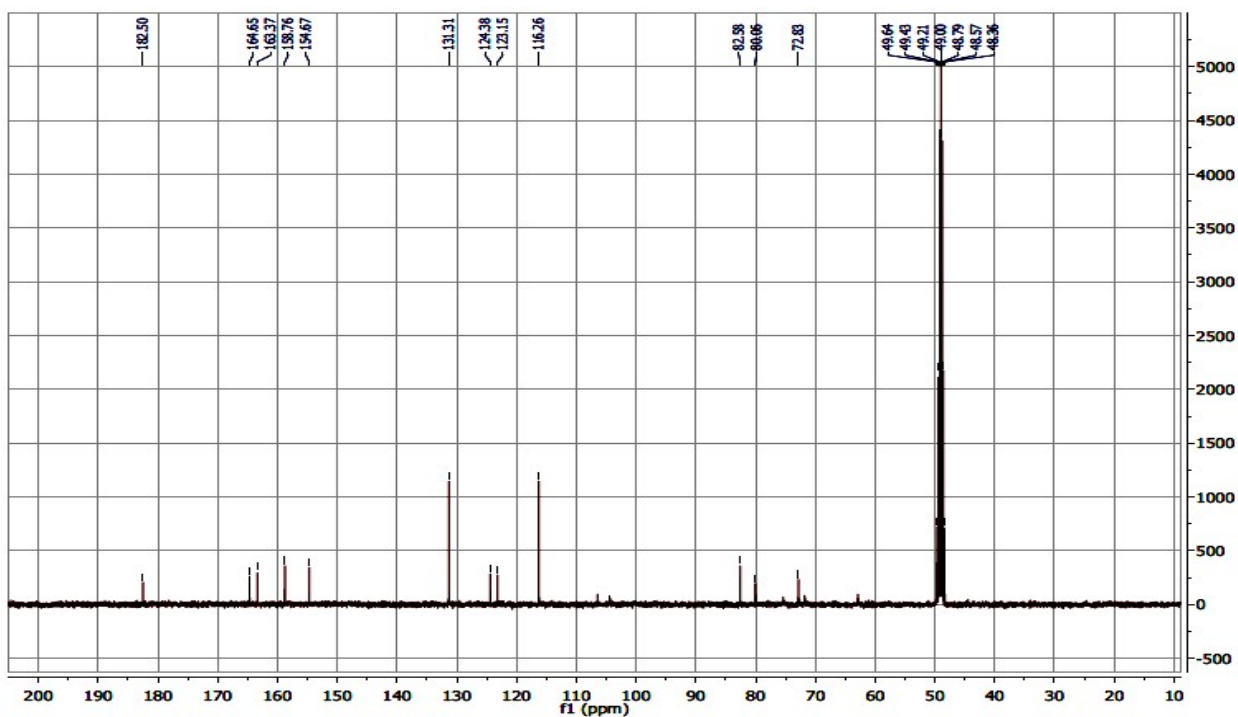

Figure S16:  $^{13}\text{C}$  NMR spectrum ( $\text{CD}_3\text{OD}$ , 100 MHz) of compound **8**

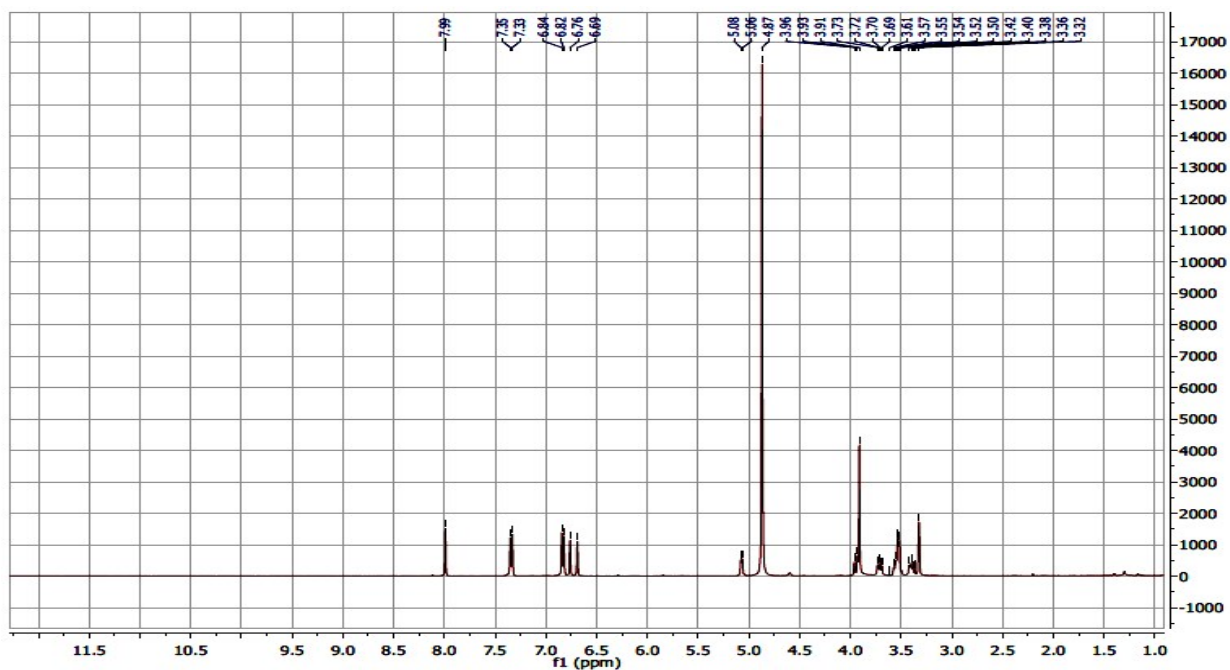

Figure S17: <sup>1</sup>H - NMR spectrum (CD<sub>3</sub>OD, 400 MHz) of compound 9

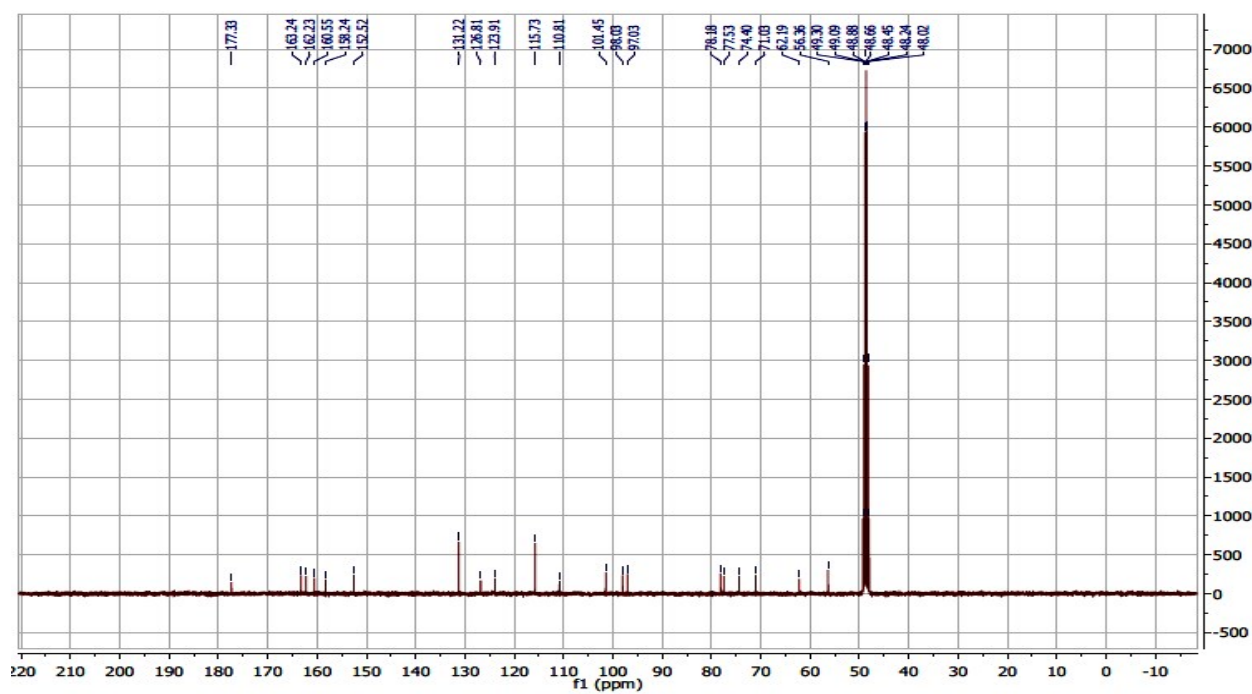

Figure S18: <sup>13</sup>C NMR spectrum (CD<sub>3</sub>OD, 100 MHz) of compound 9

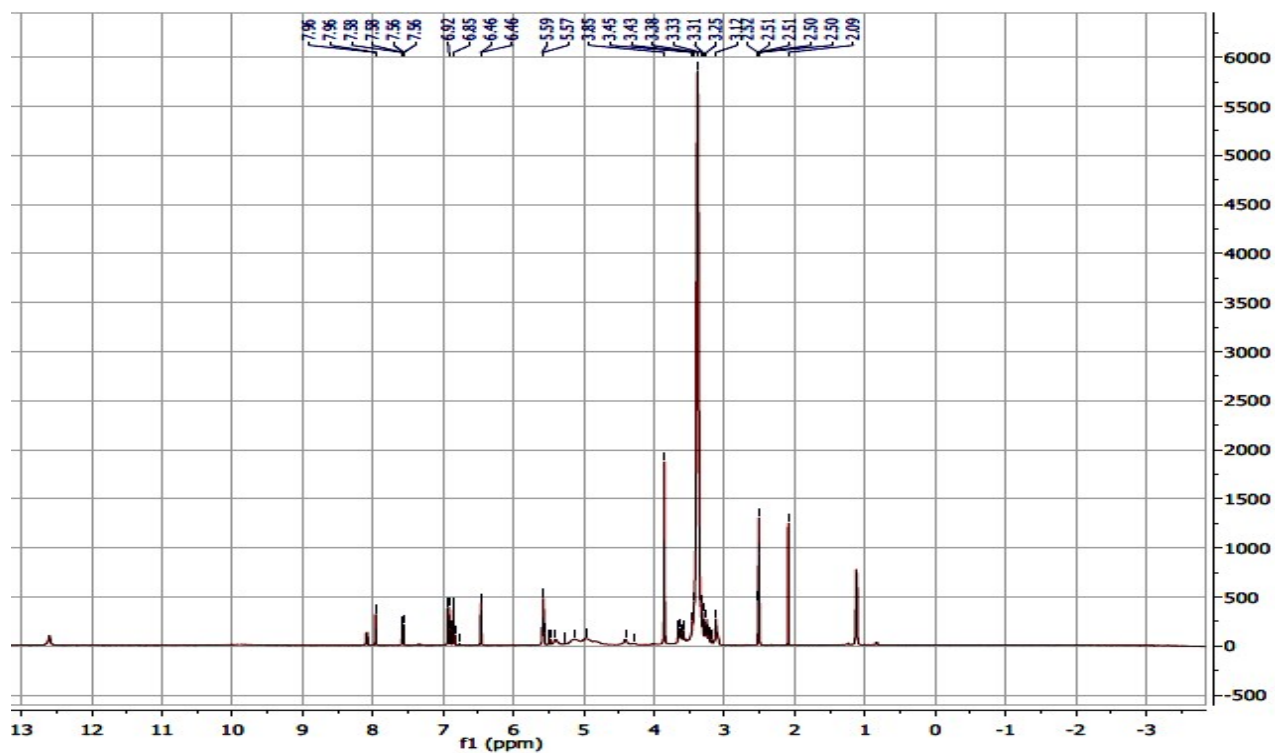

Figure S19:  $^1\text{H}$  - NMR spectrum (DMSO- $d_6$ , 400 MHz) of compound **10**

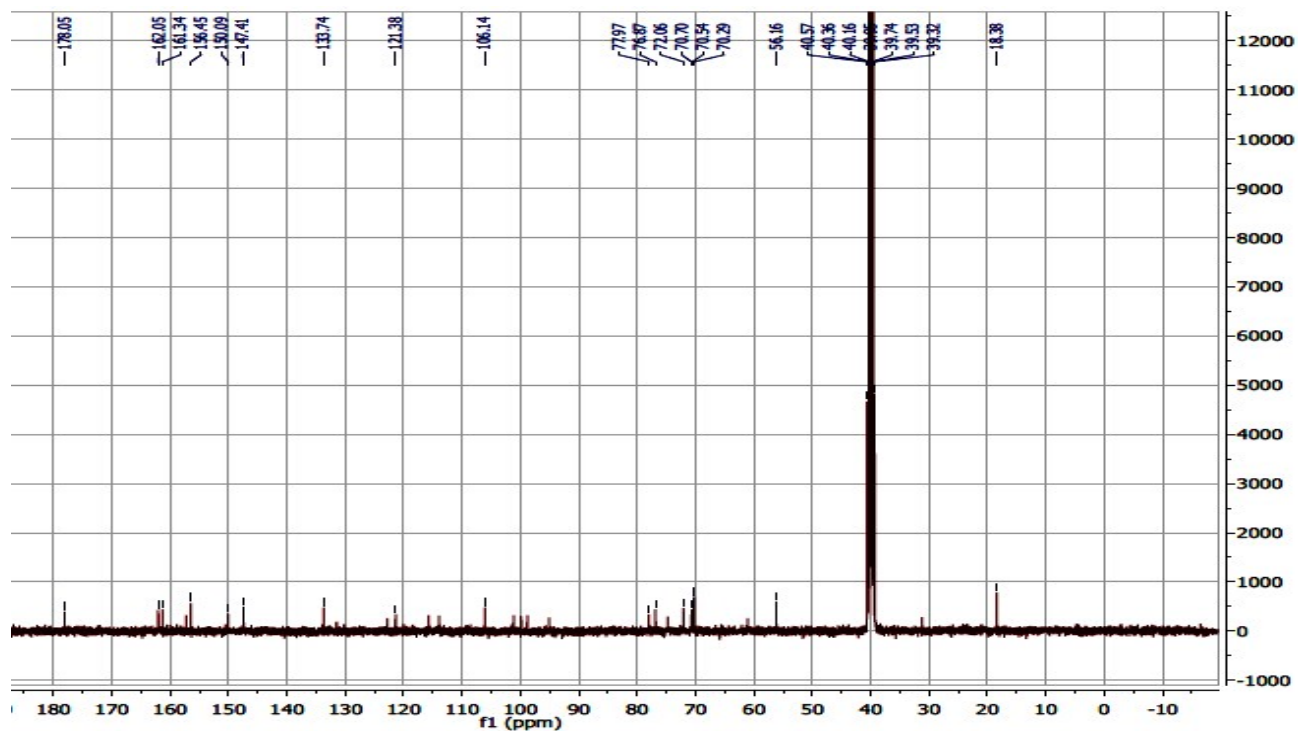

Figure S20:  $^{13}\text{C}$  NMR spectrum (DMSO- $d_6$ , 400 MHz) of compound **10**
